# Supplementary material for: Racial and Ethnic Differences in Use of State-Operated Inpatient Substance Abuse Services, 2004–2005 Versus 2010–2011
Source: Atypon-hosted journal article supplement (doi:10.1176/appi.ps.201600003), 2018-10-05
Supplement: appi.ps.201600003.ds001.pdf [file appi.ps.201600003.ds001.pdf]

Tables for Online Appendix

Table 1. *Demographic and treatment-related variables by race and ethnicity*

| Variables                                       |           | African Americans |                    |    | Hispanics Americans |    | Whites Americans   |    | F or $\chi^2$ | df             | P     |
|-------------------------------------------------|-----------|-------------------|--------------------|----|---------------------|----|--------------------|----|---------------|----------------|-------|
|                                                 |           | N Total           | N or mean $\pm$ SD | %  | N or mean $\pm$ SD  | %  | N or mean $\pm$ SD | %  |               |                |       |
| Total number                                    | 2004-2005 | 1484              | 495                | 33 | 492                 | 33 | 497                | 34 |               |                |       |
|                                                 | 2010-2011 | 4,529             | 759                | 17 | 781                 | 17 | 2,989              | 66 |               |                |       |
| Male                                            | 2004-2005 | 1484              | 338                | 68 | 405                 | 82 | 345                | 69 | 30.65         | 2              | <.001 |
|                                                 | 2010-2011 | 3,219             | 526                | 69 | 640                 | 82 | 2,053              | 69 | 54.36         | 2              | <.001 |
| Mean Age                                        | 2004-2005 | 1484              | 40.01 $\pm$ 8.84   |    | 36.08 $\pm$ 8.91    |    | 34.88 $\pm$ 9.96   |    | 41.63         | 2,             | <.001 |
|                                                 | 2010-2011 | 4,529             | 42.96 $\pm$ 9.30   |    | 38.78 $\pm$ 9.52    |    | 36.40 $\pm$ 11.13  |    | 119.46        | 1481<br>2,4526 | <.001 |
| Marital Status--<br>Married                     | 2004-2005 | 1482              | 37                 | 8  | 45                  | 9  | 46                 | 9  | 1.25          | 2              | .54   |
|                                                 | 2010-2011 | 321               | 69                 | 10 | 51                  | 7  | 201                | 7  | 6.14          | 2              | <0.05 |
| Education Level--<br>At least a High            | 2004-2005 | 1172              | 310                | 64 | 205                 | 42 | 362                | 75 | 108.65        | 2              | <.001 |
|                                                 | 2010-2011 | 3,134             | 440                | 61 | 325                 | 44 | 2369               | 83 | 489.49        | 2              | <.001 |
| Housing Status—<br>Housed                       | 2004-2005 | 1484              | 419                | 85 | 420                 | 85 | 419                | 84 | 0.22          | 2              | .89   |
|                                                 | 2010-2011 | 3,825             | 626                | 88 | 619                 | 86 | 2580               | 91 | 23.31         | 2              | <.001 |
| Employment<br>Status--Employed<br>or part time) | 2004-2005 | 1478              | 23                 | 5  | 23                  | 5  | 35                 | 7  | 3.69          | 2              | .16   |
|                                                 | 2010-2011 | 199               | 19                 | 3  | 19                  | 3  | 161                | 6  | 19.87         | 2              | <.001 |
| GAF at<br>Admission                             | 2004-2005 | 1396              | 41.55 $\pm$ 6.66   |    | 40.59 $\pm$ 6.82    |    | 41.08 $\pm$ 6.96   |    | 2.35          | 2,1393         | .10   |
|                                                 | 2010-2011 | 4,425             | 40.38 $\pm$ 4.84   |    | 41.13 $\pm$ 5.58    |    | 39.18 $\pm$ 5.31   |    | 47.58         | 2,4422         | <.001 |

Table 2. *The Effects of Race-Ethnicity on Referral Source, Length of Stay, and Legal Status After Controlling for Demographic Variables and Symptom Severity*

| Predictors                             | Self-Referral |           | Criminal justice Referral |           | Other Referral source (e.g., family, outpatient, residential) |           | Legal Status-Voluntary |           | Legal Status – Emergency/Crisis |           | Length of Stay |           |
|----------------------------------------|---------------|-----------|---------------------------|-----------|---------------------------------------------------------------|-----------|------------------------|-----------|---------------------------------|-----------|----------------|-----------|
|                                        | 2004-2005     | 2010-2011 | 2004-2005                 | 2010-2011 | 2004-2005                                                     | 2010-2011 | 2004-2005              | 2010-2011 | 2004-2005                       | 2010-2011 | 2004-2005      | 2010-2011 |
| <b><i>I. Demographic Variables</i></b> |               |           |                           |           |                                                               |           |                        |           |                                 |           |                |           |
| <i>Sex</i>                             | 1.04          | 0.93      | 0.96                      | 1.17      | 1.11                                                          | 0.97      | .85                    | 1.01      | 1.07                            | 1.51      | 09**           | 0.05***   |
| <i>Marital Status</i>                  | 1.05          | 0.77      | 1.08                      | 0.90      | 0.93                                                          | 1.45      | 1.53                   | 0.98      | 0.73                            | 1.01      | -0.03          | -0.02     |
| <i>Education level</i>                 | 0.98          | 0.80*     | 0.92                      | 1.19      | 0.85                                                          | 1.25      | 0.91                   | 1.06      | 0.99                            | 0.53      | -0.04          | 0.02      |
| <i>Employment status</i>               | 0.46**        | 1.01      | 1.22                      | 1.82      | 0.44                                                          | 0.82      | 0.81                   | 1.06      | 0.84                            | 0.49      | -0.04          | -0.08***  |
| <i>Housing status</i>                  | 1.49*         | 0.68**    | 2.81*                     | 0.84      | 0.53                                                          | 1.45      | 1.32                   | 1.03      | 0.83                            | 1.12      | 0              | 0.03      |
| <i>Admission age</i>                   | 0.98**        | 0.10      | 0.93***                   | 0.96***   | 1.01                                                          | 1.02*     | 1.00                   | 1.01      | 1.02*                           | 1.07***   | 0.02           | 0.05**    |
| <i>Admission GAF</i>                   | 1.02*         | 0.95***   | 0.98                      | 0.98      | 0.98                                                          | 1.12***   | 1.08***                | 1.09***   | 0.91***                         | 0.94*     | -0.05          | -0.21***  |
| <b><i>II. Race /Ethnicity</i></b>      |               |           |                           |           |                                                               |           |                        |           |                                 |           |                |           |
| <i>African American vs. White</i>      | 1.03          | 0.84      | 2.76***                   | 1.71**    | 1.96                                                          | 1.27      | 1.35                   | 1.52      | 0.55**                          | 0.80*     | 0.08*          | 0.06***   |
| <i>Hispanic vs. White</i>              | 1.44*         | 0.75*     | 0.8                       | 0.93      | 3.28**                                                        | 2.11***   | 1.56*                  | 2.42**    | 0.59*                           | 0.30      | -0.14***       | -0.03*    |
| <i>African American vs. Hispanic</i>   | 0.72*         | 1.12      | 3.44***                   | 1.84*     | 0.6                                                           | 0.60*     | 1.16                   | 0.63      | 0.94                            | 0.26      | 0.22***        | 0.09***   |

Notes: All the values are expressed as odds ratios for logistic regression or standardized betas for linear regression. All regression models show findings from final regression step where all variables are included. \*= $p < .05$ , \*\*= $p < .01$ , \*\*\*= $p < .001$ .

Control variables included: binary variables--gender (female vs. male), marital status (married/civil union vs. never married/divorced/single), education level (no high school degree vs. at least high school degree/GED), housing status (homeless vs. housed), and employment status (unemployed vs. employed full/part time)—and continuous variables of age and global assessment of functioning at admission (GAF).

Table 3. *The Effects of Race-Ethnicity on Axis I and II Diagnosis after Controlling for Demographic Variables and Symptom Severity*

| <i>I. Demographic Variables</i>      | <b>Alcohol-Related Diagnosis At Admission</b> |           | <b>Drug-Related Diagnosis At Admission</b> |           | <b>Cluster B Personality Disorder At Admission</b> |           | <b>Personality Disorder NOS At Admission</b> |           | <b>No Axis II Diagnosis or Diagnosis Deferred at Admission</b> |           | <b>Cluster B Personality Disorder At Discharge</b> |           | <b>No Axis II Diagnosis or Diagnosis Deferred at Discharge</b> |           |
|--------------------------------------|-----------------------------------------------|-----------|--------------------------------------------|-----------|----------------------------------------------------|-----------|----------------------------------------------|-----------|----------------------------------------------------------------|-----------|----------------------------------------------------|-----------|----------------------------------------------------------------|-----------|
|                                      | 2004-2005                                     | 2010-2011 | 2004-2005                                  | 2010-2011 | 2004-2005                                          | 2010-2011 | 2004-2005                                    | 2010-2011 | 2004-2005                                                      | 2010-2011 | 2004-2005                                          | 2010-2011 | 2004-2005                                                      | 2010-2011 |
| <i>Sex</i>                           | 0.73*                                         | 1.23**    | 1.26                                       | 0.84*     | 1.65                                               | 0.64      | 1.44                                         | 0.36***   | 0.64                                                           | 2.18***   | 1.62*                                              | 0.67      | 0.64*                                                          | 1.52**    |
| <i>Marital Status</i>                | 0.61*                                         | 1.06      | 1.58                                       | 0.96      | 1.35                                               | 0.92      | 0.4                                          | 1.25      | 1.42                                                           | 0.89      | 1.54                                               | 1.61      | 0.91                                                           | 0.64      |
| <i>Education level</i>               | 0.76*                                         | 0.99      | 1.21                                       | 1.03      | 0.44                                               | 0.95      | 0.68                                         | 2.02**    | 1.66                                                           | 0.70      | 1.06                                               | 1.89**    | 0.97                                                           | 0.67**    |
| <i>Employment status</i>             | 2.15**                                        | 0.67*     | 0.41**                                     | .1.51*    | 0.00                                               | 1.02      | 0.69                                         | 1.03      | 2.57                                                           | 0.94      | 1                                                  | 2.23      | 1.05                                                           | 0.80      |
| <i>Housing status</i>                | 1.02                                          | 1.13      | 1.1                                        | 0.88      | 0.91                                               | 2.07*     | 0.72                                         | 1.73      | 1.21                                                           | 0.51**    | 0.53*                                              | 2.73***   | 1.95**                                                         | .42***    |
| <i>Admission age</i>                 | 1.08***                                       | 1.07***   | 0.93***                                    | 0.93***   | 0.98                                               | 0.99      | 1.01                                         | 0.98      | 1.00                                                           | 1.01      | 0.98                                               | 0.99      | 1.01                                                           | 1.00      |
| <i>Admission GAF</i>                 | 1                                             | 0.98**    | 1                                          | 1.03***   | 0.99                                               | 1.14***   | 0.99                                         | 1.13***   | 1.01                                                           | .88***    | 1                                                  | 1.10***   | 1.01                                                           | 0.90***   |
| <b><i>II Race/Ethnicity</i></b>      |                                               |           |                                            |           |                                                    |           |                                              |           |                                                                |           |                                                    |           |                                                                |           |
| <i>African American vs. White</i>    | 0.60**                                        | 1.26*     | 1.56**                                     | 0.81*     | 1.43                                               | 1.76      | 1.59                                         | 1.55      | 0.75                                                           | .57*      | 2.11*                                              | 1.07      | 0.66                                                           | 1.00      |
| <i>Hispanic vs. White</i>            | 0.21***                                       | 0.50***   | 4.12***                                    | 2.00***   | 0.54                                               | 2.60**    | 0.41                                         | 2.07*     | 2.44*                                                          | .42***    | 1.99*                                              | 1.78*     | 0.63*                                                          | 0.55***   |
| <i>African American vs. Hispanic</i> | 2.83***                                       | 2.50***   | 0.38***                                    | 0.41***   | 2.64                                               | 0.68      | 3.91*                                        | 0.75      | 1.34                                                           | 1.36      | 1.06                                               | .60       | 1.06                                                           | 1.84**    |

Notes: All the values are expressed as odds ratios for logistic regression or standardized betas for linear regression. All regression models show findings from final regression step where all variables are included. \*= $p < .05$ , \*\*= $p < .01$ , \*\*\*= $p < .001$ . Results are presented for admission only; at discharge models were significant and in the same direction, unless otherwise specified, except the Hispanic vs White comparison was not significant for Primary Axis I Diagnosis of Alcohol-Related Disorder at Discharge
